# Supplementary material for: Real-time measurements of product compounds formed through the reaction of ozone with breath exhaled VOCs
Source: Royal Society of Chemistry journal article supplement (doi:10.1039/d2em00339b), 2022-01-01
Supplement: d2em00339b1.pdf [file d2em00339b1.pdf]

## Supplementary Material

### **Real-time measurements of product compounds formed through the reaction of ozone with breath exhaled VOCs**

Xin Xu<sup>1,2,3</sup>, Hongwei Pang<sup>4,5,6</sup>, Chao Liu<sup>1,2,3</sup>, Kangyi Wang<sup>1,2,3</sup>, Gwendal Loisel<sup>4,5,6</sup>, Lei Li<sup>1,2,3</sup>,  
Sasho Gligorovski<sup>4,5,6\*</sup>, Xue Li<sup>1,2,3\*</sup>

<sup>1</sup>Institute of Mass Spectrometry and Atmospheric Environment, Jinan University, Guangzhou  
510632, China

<sup>2</sup>Guangdong Provincial Engineering Research Center for On-line Source Apportionment System  
of Air Pollution, Guangzhou, 510632, China

<sup>3</sup>Guangdong-Hongkong-Macau Joint Laboratory of Collaborative Innovation for Environmental  
Quality, Guangzhou, 510632, China

<sup>4</sup>State Key Laboratory of Organic Geochemistry and Guangdong Provincial Key Laboratory of  
Environmental Protection and Resources Utilization, Guangzhou Institute of Geochemistry,  
Chinese Academy of Sciences, Guangzhou 510640, China

<sup>5</sup>Guangdong-Hong Kong-Macao Joint Laboratory for Environmental Pollution and Control,  
Guangzhou Institute of Geochemistry, Chinese Academy of Science, Guangzhou 510640, China

<sup>6</sup>Chinese Academy of Science, Center for Excellence in Deep Earth Science, Guangzhou,  
510640, China

\* corresponding authors

Email: tamylee@jnu.edu.cn; gligorovski@gig.ac.cn

*Submitted to Environmental Science: Processes & Impacts*

|                   |   |
|-------------------|---|
| Number of texts   | 3 |
| Number of figures | 7 |
| Number of tables  | 6 |

**Table of contents**

**Experimental Section**

**Text S1: .....3**

**Text S2 .....3**

**Text S3 .....4**

**Figure S1 .....5**

**Figure S2 .....6**

**Figure S3 .....7**

**Figure S4 .....9**

**Figure S5 .....10**

**Figure S6 .....11**

**Figure S7 .....12**

**Table S1 .....12**

**Table S2 .....13**

**Table S3. ....13**

**Table S4 .....14**

**Table S5 .....16**

**Table S6 .....18**

## 1 **Text S1: Blank sample**

2 For both real and simulated breath samples, the blank sample was prepared by filling zero air into  
3 a homemade 40-L Nalophan (Scentroid, Canada) bag (Figure S1). Before being delivered into the  
4 reaction chamber, the humidity of zero air was adjusted to the level as same as that in the breath  
5 (i.e., relative humidity (RH) 92%–94%) by using a humidifier (Figure S1). Then the zero air was  
6 pumped into the reaction chamber at a flow rate of 1.5 L min<sup>-1</sup> controlled by a sampling pump  
7 (FCG-5, YanCheng Galaxy Science & Technology LTD, China).

8

## 9 **Text S2: Data analysis**

10 MS Raw data were pretreated as reported before and ions with signal intensity  $\geq 2.5 \times 10^5$  a.u.  
11 were extracted for further analysis<sup>1</sup>. For cluster analysis, those clusters were defined based on the  
12 degree of similarity. In the study, hierarchical analysis in MATLAB (R2018b) was performed to  
13 discover  $m/z$  values sharing the same intensity temporal profiles. The pdist function is used to  
14 calculate the distance between every pair of objects (i.e.,  $m/z$  values in our case) in a data set. For  
15 a data set made up of  $m$  objects, there are  $m*(m - 1)/2$  pairs in the data set. The result of this  
16 computation is commonly known as a distance or dissimilarity matrix. Once the proximity between  
17 objects in the data set has been computed, it can determine how objects in the data set should be  
18 grouped into clusters, using the linkage function. The linkage function takes the distance  
19 information generated by pdist and links pairs of objects that are close together into binary clusters  
20 (clusters made up of two objects). The linkage function then links these newly formed clusters to  
21 each other and to other objects to create bigger clusters until all the objects in the original data set  
22 are linked together in a hierarchical tree. For data mining,  $t$ -test (GraphPad Prism 7) was performed

23 to identify the possible products from O<sub>3</sub> reaction with exhaled human breath containing VOCs.  
 24 When the  $p$  value is  $< 0.0001$ , it is considered that there is a significant difference between the two  
 25 groups of samples <sup>2</sup>. Therefore,  $p < 0.0001$  was adopted in this study to determine the potential  
 26 products resulting from O<sub>3</sub> reaction with breath VOCs. Finally, the element compositions of  
 27 individual products were given using commercial software Xcalibur (Thermo Scientific, USA).  
 28 To identify and characterize the detected aromatic compounds we used the aromaticity equivalent  
 29 ( $X_C$ ) which is mathematical parameter calculated as follows <sup>3-5</sup>. Therefore,  $X_C$  of the organic  
 30 compounds, which contain C, H, O, and N in their chemical structures, was calculated as follows:

$$31 \quad X_C = \frac{2C + N - H - 2mO - 2nS}{DBE - mO - nS} \quad (\text{Eq-S1})$$

32 where  $m$  and  $n$  represent the fraction of oxygen and sulfur atoms, involved in the  $\pi$ -bonds of a  
 33 molecular structure <sup>3</sup>. In this study,  $m$  and  $n$  were set to 0.5, since the ESI- mode is most sensitive  
 34 to compounds that contain carboxylic functional groups <sup>4</sup>. Threshold values of  $X_C$  were set as,  $2.50$   
 35  $\leq X_C < 2.71$ , and  $X_C \geq 2.71$ , as criteria for the presence of aromatics or multi-core aromatic  
 36 compounds in the identified ions, respectively <sup>5-7</sup>.

### 37 **Text S3: Calculation of normalized intensity of products.**

38 In many recent studies, peak abundance comparisons in mass spectrometry have been used to show  
 39 the relative importance of different types of compounds <sup>5,8-10</sup>. However, the ionization efficiencies  
 40 of different classes of compounds can vary widely <sup>11</sup>, so comparing peak abundances between  
 41 different compounds is likely to produce uncertainty. Calculation of normalized intensity of  
 42 product compounds formed during the gas-phase reaction of O<sub>3</sub> with VOCs from exhaled breath  
 43 was performed by using 2-butanone as a reference compound <sup>12</sup>:

$$C_i = \frac{Int_i}{Int_{BUT}} \times C_{BUT} \quad (\text{Eq-S2})$$

where  $C_i$  is the mixing ratio (pptv or ppbv) of compound  $i$  detected during the experiments,  $Int_{BUT}$  is the intensity of 2-butanone,  $Int_i$  is the intensity of product  $i$ , and  $C_{BUT}$  is the mixing ratio of 2-butanone, i.e., 2 ppbv.

The calculation of the normalized intensity indicated the occurrence of 17 positive ions and 15 negative ions at mixing ratio higher than 5 pptv, which were assigned to 24 compounds (Table S6). We emphasize the discussion on seven compounds with mixing ratio higher than 100 pptv which were observed in both cases i.e. products resulting from ozonolysis of human breath and from reaction of  $O_3$  with standard compounds (Table S6). The two most prominent products produced by the reactions of  $O_3$  with isoprene and  $\alpha$ -terpinene were  $A_{10}$  or  $B_{10}$  (104–125 pptv) which formation is described below in the “reaction mechanism”.

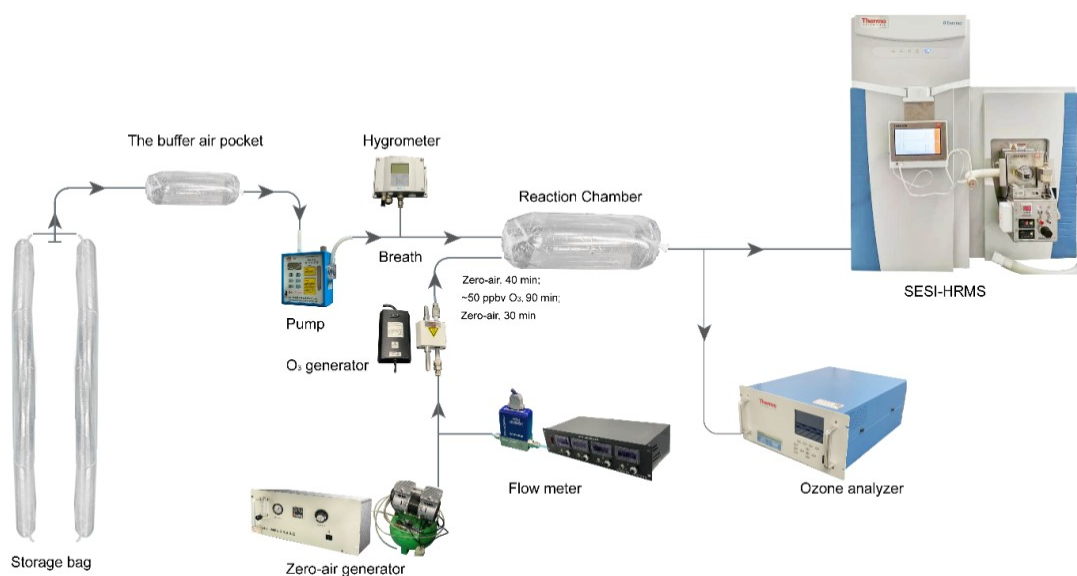

**Figure S1.** Experimental set-up for real-time monitoring of ozone ( $O_3$ ) reaction with exhaled human breath.

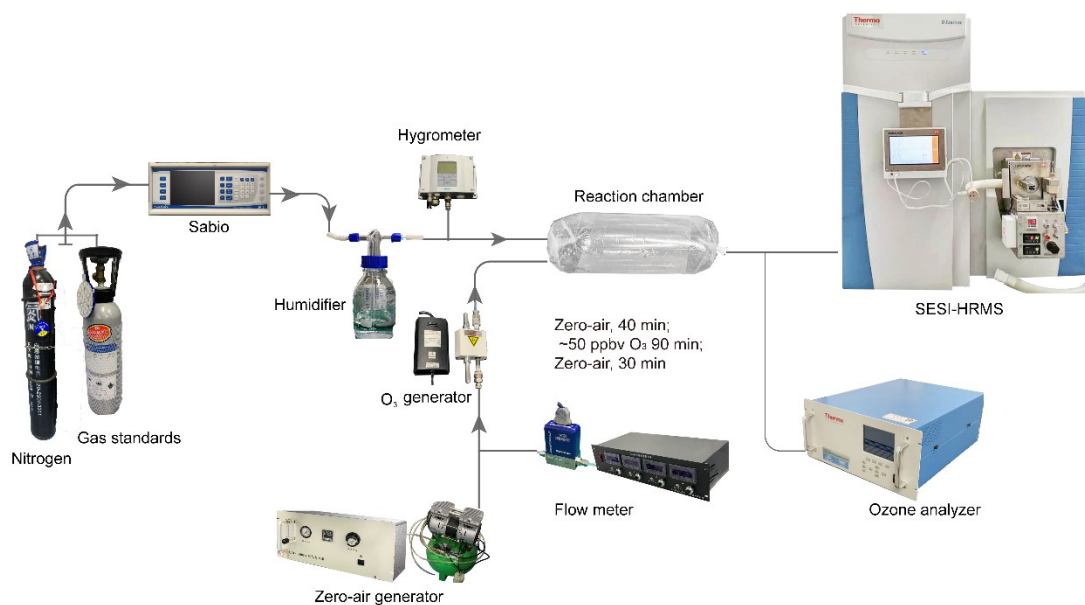

57

**Figure S2.** Experimental set-up for real-time monitoring of  $O_3$  reaction with standard compounds which are typical VOCs identified in human breath.

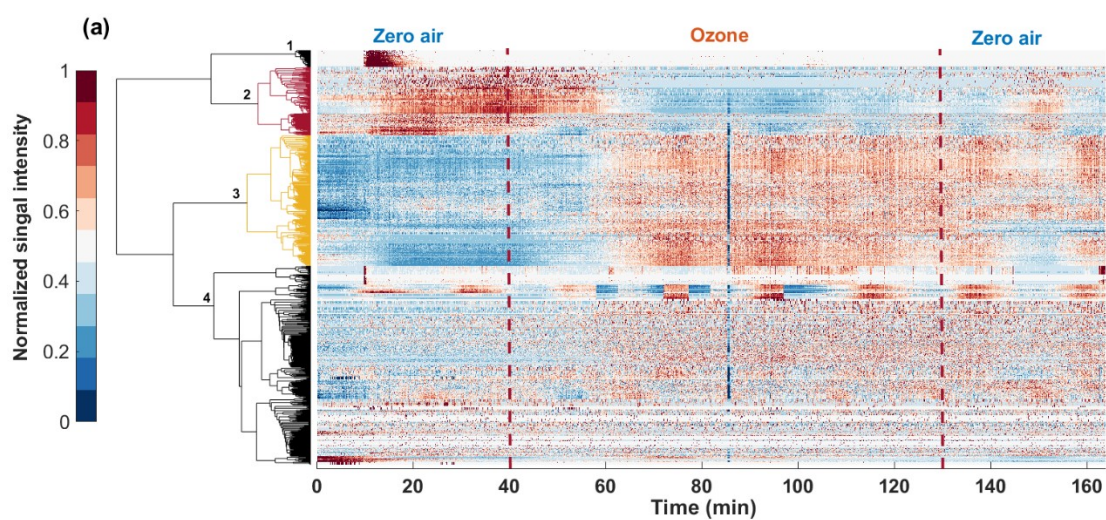

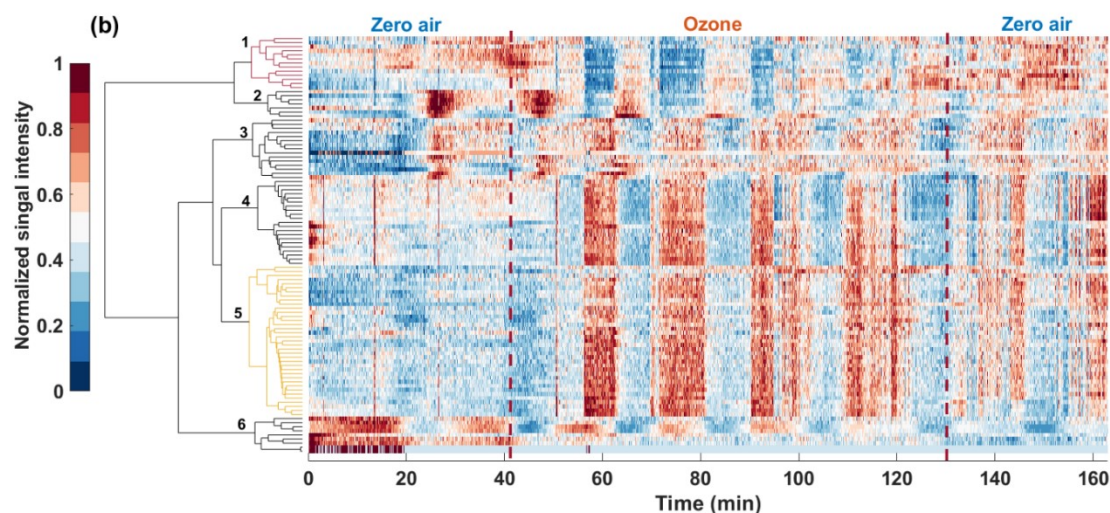

**Figure S3.** Hierarchical cluster analysis of (a) 694 ions detected in the positive ion detection mode and (b) 102 ions detected in the negative ion detection mode. The normalized signal intensity in hierarchical cluster is presented by a color-coded scale, i.e., the signal intensity increases from dark blue (normalized value is 0) to wine red (normalized value is 1). It should be noted that the periodic fluctuations of signal intensities over time in Figure S3a Cluster 4 and Figure S3b are due to the MS/MS analyses performed for these ions at certain time periods.

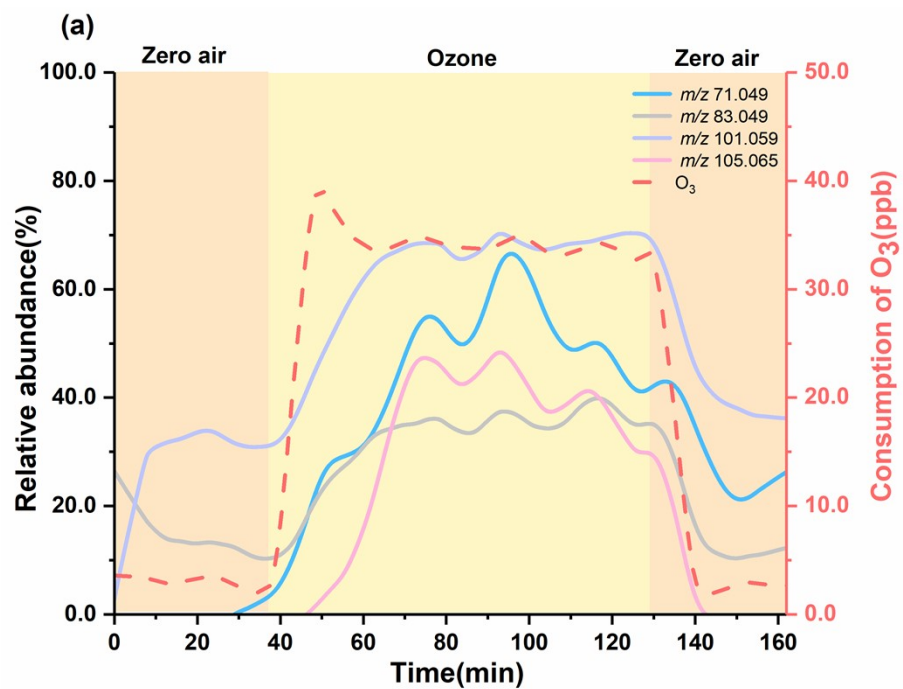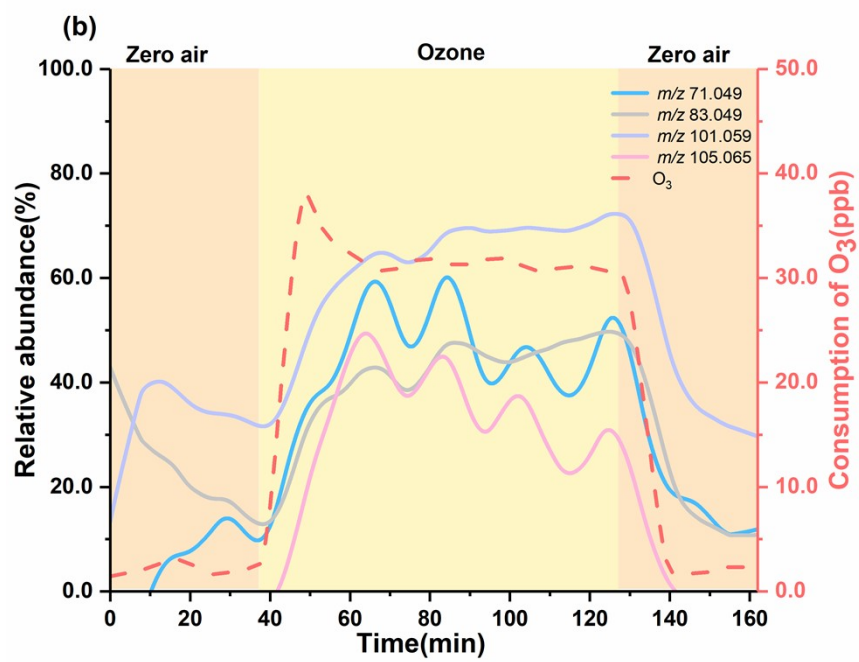

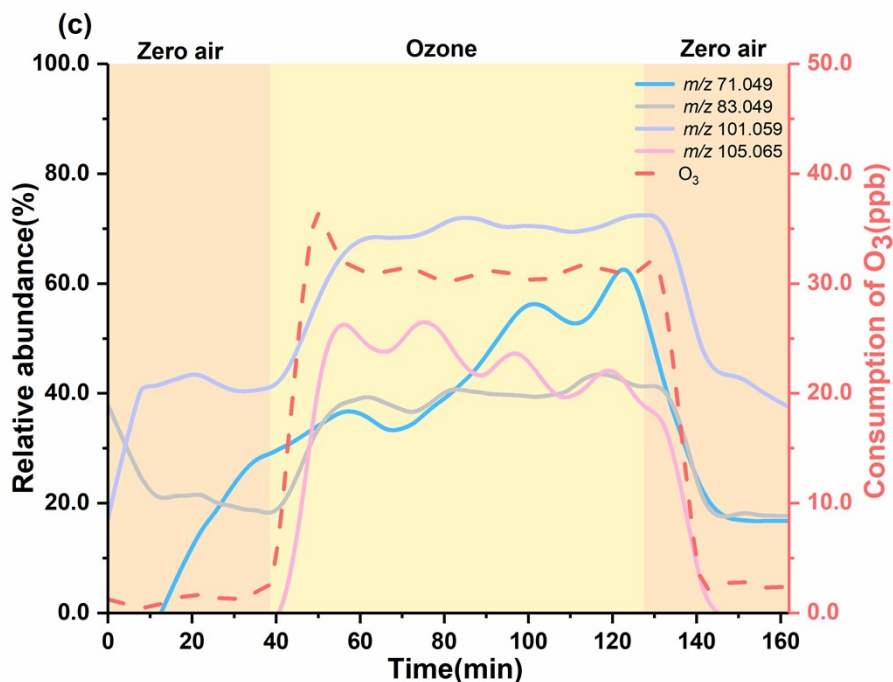

59

60 **Figure S4.** Intensity-time profiles (solid lines) of ions detected in positive mode and time profile  
 61 (dash line) of O<sub>3</sub> mixing ratio for human breath samples (a) YZH-Pos, (b) CX-Pos and (c) LC-Pos,  
 62 relative abundance is defined as the intensity of each ion normalized to the highest intensity during  
 63 the full course of reaction.

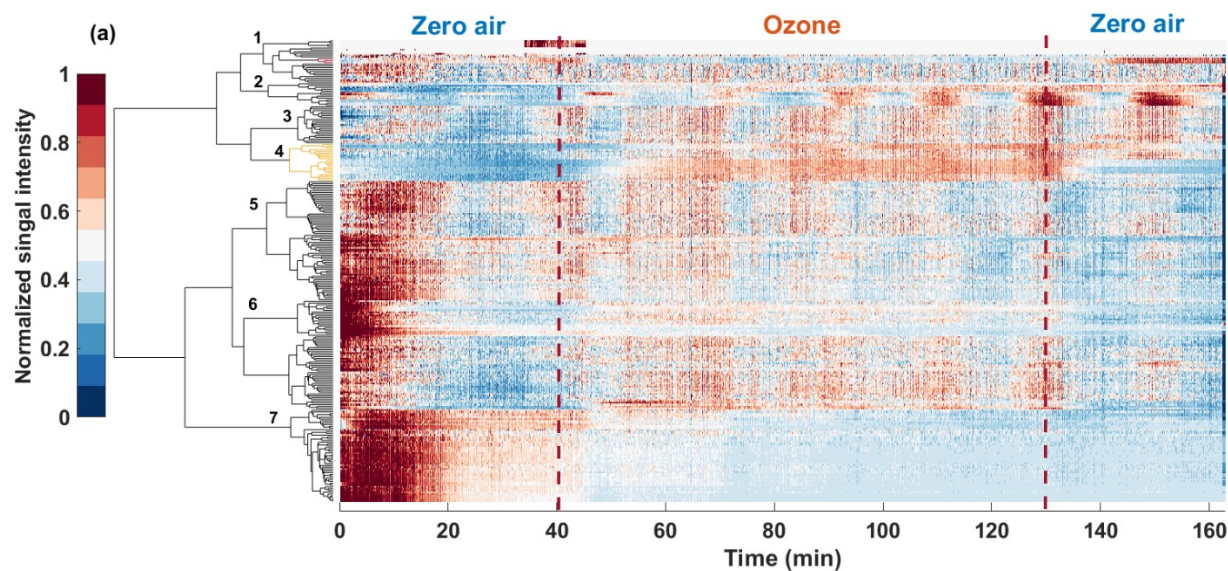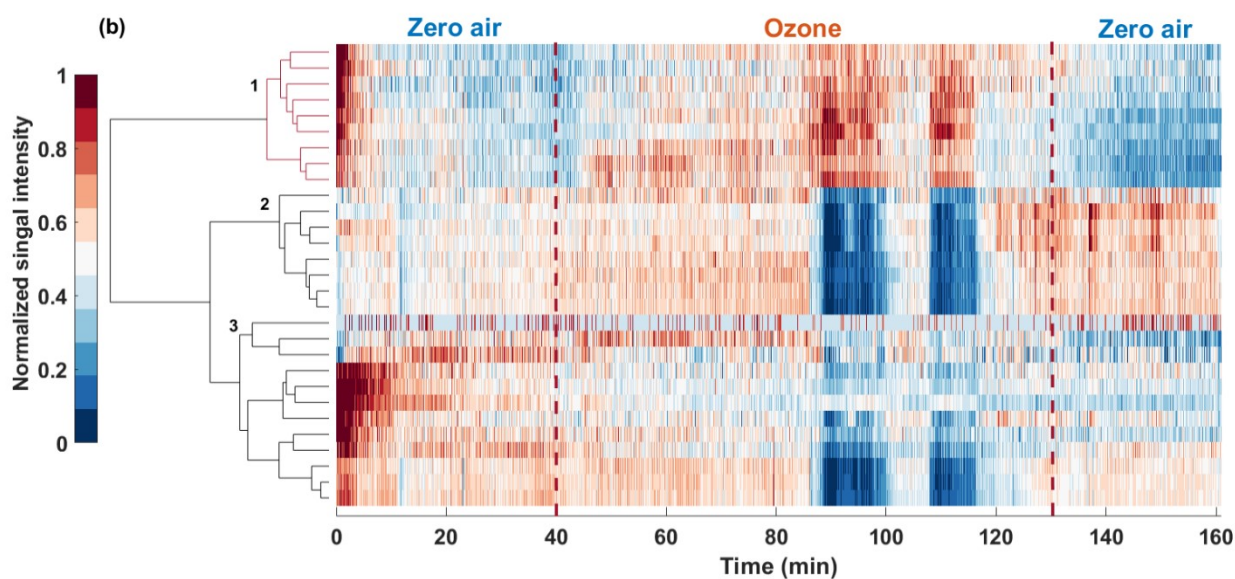

**Figure S5.** Hierarchical cluster analysis of ions produced by the reaction of  $O_3$  and standard isoprene in (a) positive mode and (b) negative mode. The normalized signal intensity in hierarchical cluster is presented by a color-coded scale, i.e., the signal intensity increases from dark blue (normalized value is 0) to wine red (normalized value is 1).

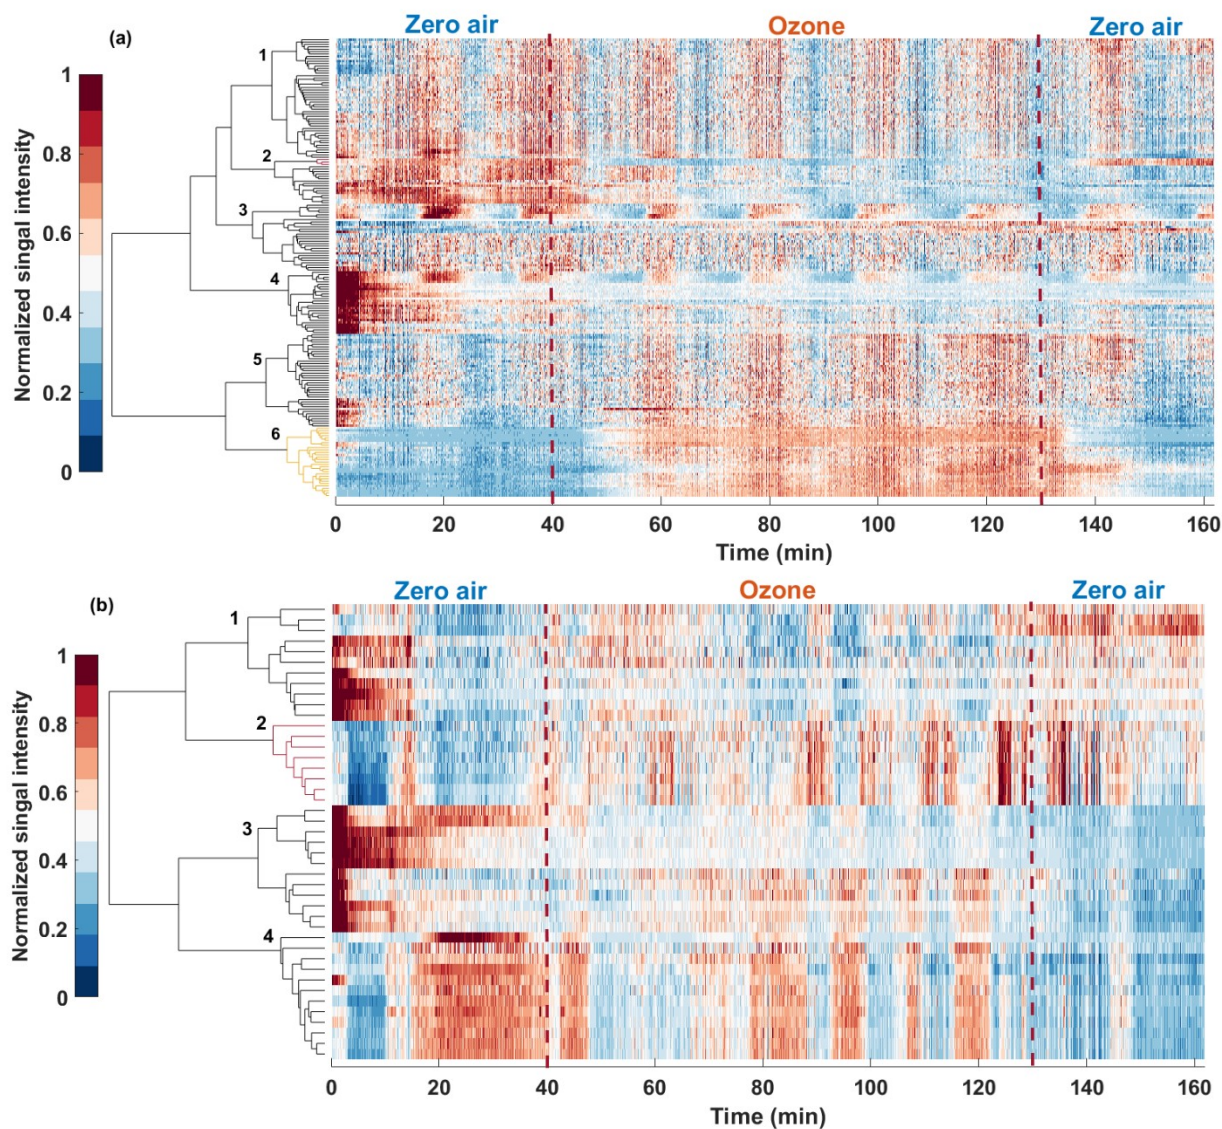

**Figure S6.** Hierarchical cluster analysis of ions produced by the reaction of  $O_3$  and standard  $\alpha$ -terpinene in (a) positive mode and (b) negative mode. The normalized signal intensity in hierarchical cluster is presented by a color-coded scale, i.e., the signal intensity increases from dark blue (normalized value is 0) to wine red (normalized value is 1).

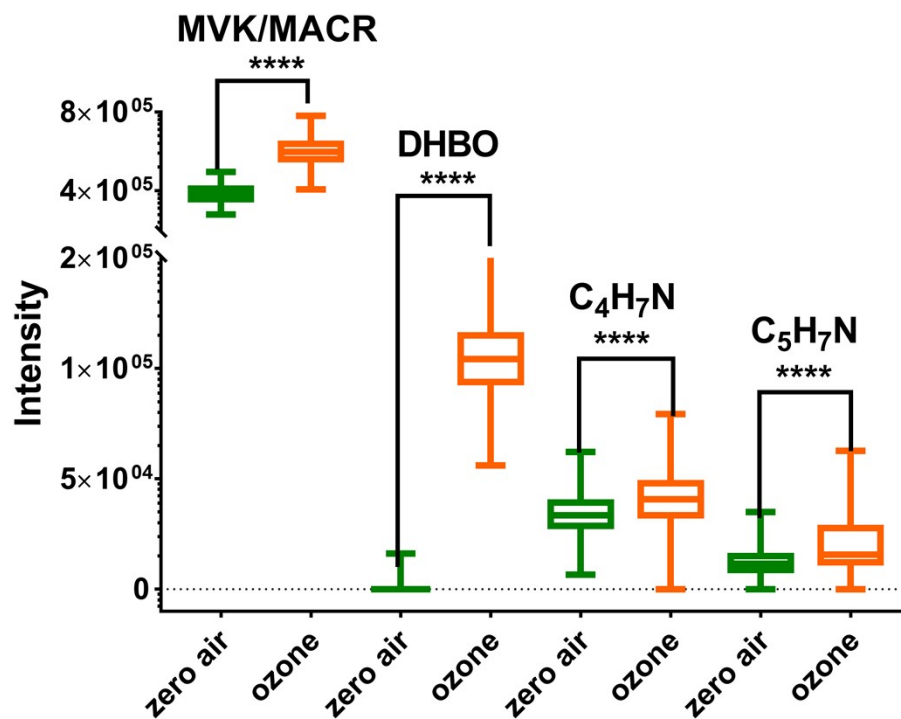

**Figure S7.** The box plot of MVK, MACR, DHBO and the imine compounds.

**Table S1.** Mixing ratios and RH values of simulated breath samples prepared using two individual standard gases.

| Parameters   | Samples               | Value    |
|--------------|-----------------------|----------|
| RH           | All simulated samples | 92%–94%  |
| Mixing ratio | Isoprene              | 730 pptv |
|              | $\alpha$ -terpinene   | 410 pptv |

86 **Table S2.** The mixing ratios of isoprene and  $\alpha$ -terpinene in 9 subjects breath samples.

| Subject | Subject Mixing ratio (ppbv) |                     |
|---------|-----------------------------|---------------------|
|         | Isoprene                    | $\alpha$ -Terpinene |
| 1       | 0.74                        | 0.17                |
| 2       | 1.16                        | 0.17                |
| 3       | 1.83                        | 0.67                |
| 4       | 0.67                        | 0.73                |
| 5       | 0.38                        | 0.24                |
| 6       | 0.40                        | 0.66                |
| 7       | 0.80                        | 0.39                |
| 8       | 0.42                        | 0.29                |
| 9       | 0.20                        | 0.17                |
| AVE     | 0.73                        | 0.39                |

87 <sup>a</sup>Results of subjects 5–9 are from other experiments.

88

89

90 **Table S3.** Number of ions detected by SESI-HRMS for four subjects.

| Subject | Detection mode   | No. of ions | No. of product ions <sup>c</sup> |
|---------|------------------|-------------|----------------------------------|
| YZH     | Pos <sup>a</sup> | 694         | 219                              |
|         | Neg <sup>b</sup> | 124         | 3                                |
| CX      | Pos              | 831         | 44                               |
|         | Neg              | 112         | 16                               |
| LC      | Pos              | 851         | 42                               |
|         | Neg              | 131         | 24                               |
| XX      | Pos              | 618         | 62                               |
|         | Neg              | 102         | 37                               |

91 <sup>a</sup>Pos: position ion detection mode; <sup>b</sup>Neg: negative ion detection mode; <sup>c</sup>product ions: ions that

92 showed an increasing trend at O<sub>3</sub> exposure stage.

**Table S4.** CHON compounds identified resulting from the reaction of O<sub>3</sub> and exhaled breath in positive (cluster 3 in figure S3a) and negative mode (cluster 5 in figure S3b).

| No. | Mode     | DBE  | <i>m/z</i> | Formula                                                       | No. | Mode     | DBE  | <i>m/z</i> | Formula                                                       |
|-----|----------|------|------------|---------------------------------------------------------------|-----|----------|------|------------|---------------------------------------------------------------|
| 1   | Positive | 2    | 58.974     | CHO <sub>2</sub> N                                            | 2   | Positive | 1    | 59.036     | C <sub>2</sub> H <sub>5</sub> ON                              |
| 3   | Positive | 0.5  | 60.044     | C <sub>2</sub> H <sub>6</sub> ON                              | 4   | Positive | 0    | 61.053     | C <sub>2</sub> H <sub>7</sub> ON                              |
| 5   | Positive | 0    | 61.055     | C <sub>2</sub> H <sub>7</sub> ON                              | 6   | Positive | 0.5  | 88.075     | C <sub>4</sub> H <sub>10</sub> ON                             |
| 7   | Positive | 0.5  | 104.07     | C <sub>4</sub> H <sub>10</sub> O <sub>2</sub> N               | 8   | Positive | 0.5  | 105.065    | C <sub>3</sub> H <sub>9</sub> O <sub>2</sub> N <sub>2</sub>   |
| 9   | Positive | 1.5  | 114.091    | C <sub>6</sub> H <sub>12</sub> ON                             | 10  | Positive | 1.5  | 114.092    | C <sub>6</sub> H <sub>12</sub> ON                             |
| 11  | Positive | 1.5  | 115.088    | C <sub>5</sub> H <sub>11</sub> ON <sub>2</sub>                | 12  | Positive | 4.5  | 115.094    | C <sub>4</sub> H <sub>11</sub> N <sub>4</sub>                 |
| 13  | Positive | 0.5  | 116.095    | C <sub>5</sub> H <sub>12</sub> ON <sub>2</sub>                | 14  | Positive | 2    | 116.098    | C <sub>5</sub> H <sub>12</sub> ON <sub>2</sub>                |
| 15  | Positive | 0.5  | 116.106    | C <sub>6</sub> H <sub>14</sub> ON                             | 16  | Positive | 1    | 118.086    | C <sub>5</sub> H <sub>12</sub> O <sub>2</sub> N               |
| 17  | Positive | 0.5  | 119.083    | C <sub>4</sub> H <sub>11</sub> O <sub>2</sub> N <sub>2</sub>  | 18  | Positive | 0    | 120.088    | C <sub>4</sub> H <sub>12</sub> O <sub>2</sub> N <sub>2</sub>  |
| 19  | Positive | 0    | 122.068    | C <sub>3</sub> H <sub>10</sub> O <sub>3</sub> N <sub>2</sub>  | 20  | Positive | 1.5  | 128.106    | C <sub>7</sub> H <sub>14</sub> ON                             |
| 21  | Positive | 10   | 133.067    | CH <sub>7</sub> ON <sub>7</sub>                               | 22  | Positive | 1    | 148.083    | C <sub>5</sub> H <sub>12</sub> O <sub>3</sub> N <sub>2</sub>  |
| 23  | Positive | 12   | 207.029    | C <sub>13</sub> H <sub>5</sub> O <sub>2</sub> N               | 24  | Positive | 12   | 207.03     | C <sub>13</sub> H <sub>5</sub> O <sub>2</sub> N               |
| 25  | Positive | 12   | 207.031    | C <sub>13</sub> H <sub>5</sub> O <sub>2</sub> N               | 26  | Positive | 0    | 222.156    | C <sub>9</sub> H <sub>22</sub> O <sub>4</sub> N <sub>2</sub>  |
| 27  | Positive | 11   | 223.063    | C <sub>14</sub> H <sub>9</sub> O <sub>2</sub> N               | 28  | Positive | 2.5  | 224.063    | C <sub>4</sub> H <sub>10</sub> O <sub>6</sub> N <sub>5</sub>  |
| 29  | Positive | 6.5  | 224.066    | C <sub>9</sub> H <sub>10</sub> O <sub>4</sub> N <sub>3</sub>  | 30  | Positive | 11   | 225.042    | C <sub>13</sub> H <sub>7</sub> O <sub>3</sub> N               |
| 31  | Positive | 7    | 225.06     | C <sub>6</sub> H <sub>7</sub> O <sub>3</sub> N <sub>7</sub>   | 32  | Positive | 2.5  | 227.175    | C <sub>12</sub> H <sub>23</sub> O <sub>2</sub> N <sub>2</sub> |
| 33  | Positive | 11   | 229.001    | C <sub>11</sub> H <sub>3</sub> O <sub>5</sub> N               | 34  | Positive | 3.5  | 252.195    | C <sub>15</sub> H <sub>26</sub> O <sub>2</sub> N              |
| 35  | Positive | 9.5  | 268.978    | C <sub>7</sub> HO <sub>8</sub> N <sub>4</sub>                 | 36  | Positive | 5.5  | 277.216    | C <sub>18</sub> H <sub>29</sub> O <sub>2</sub>                |
| 37  | Positive | 12.5 | 282.049    | C <sub>14</sub> H <sub>8</sub> O <sub>4</sub> N <sub>3</sub>  | 38  | Positive | 12.5 | 282.05     | C <sub>14</sub> H <sub>8</sub> O <sub>4</sub> N <sub>3</sub>  |
| 39  | Positive | 8.5  | 283.029    | C <sub>9</sub> H <sub>7</sub> O <sub>7</sub> N <sub>4</sub>   | 40  | Positive | 8.5  | 283.03     | C <sub>9</sub> H <sub>7</sub> O <sub>7</sub> N <sub>4</sub>   |
| 41  | Positive | 7.5  | 297.082    | C <sub>11</sub> H <sub>13</sub> O <sub>6</sub> N <sub>4</sub> | 42  | Positive | 11.5 | 298.082    | C <sub>15</sub> H <sub>12</sub> O <sub>4</sub> N <sub>3</sub> |
| 43  | Positive | 15.5 | 298.085    | C <sub>20</sub> H <sub>12</sub> O <sub>2</sub> N              | 44  | Positive | 7.5  | 299.061    | C <sub>10</sub> H <sub>11</sub> O <sub>7</sub> N <sub>4</sub> |
| 45  | Positive | 11   | 299.078    | C <sub>16</sub> H <sub>13</sub> O <sub>5</sub> N              | 46  | Positive | 11   | 299.079    | C <sub>16</sub> H <sub>13</sub> O <sub>5</sub> N              |
| 47  | Positive | 15.5 | 300.064    | C <sub>19</sub> H <sub>10</sub> O <sub>3</sub> N              | 48  | Positive | 15.5 | 300.065    | C <sub>19</sub> H <sub>10</sub> O <sub>3</sub> N              |
| 49  | Positive | 11   | 301.057    | C <sub>15</sub> H <sub>11</sub> O <sub>6</sub> N              | 50  | Positive | 11   | 301.058    | C <sub>15</sub> H <sub>11</sub> O <sub>6</sub> N              |
| 51  | Positive | 19   | 341.017    | C <sub>17</sub> H <sub>3</sub> O <sub>4</sub> N <sub>5</sub>  | 52  | Positive | 19   | 341.018    | C <sub>17</sub> H <sub>3</sub> O <sub>4</sub> N <sub>5</sub>  |
| 53  | Positive | 19   | 342.997    | C <sub>16</sub> HO <sub>5</sub> N <sub>5</sub>                | 54  | Positive | 19   | 342.998    | C <sub>16</sub> HO <sub>5</sub> N <sub>5</sub>                |
| 55  | Positive | 6.5  | 344.976    | CHO <sub>12</sub> N <sub>10</sub>                             | 56  | Positive | 18   | 357.049    | C <sub>18</sub> H <sub>7</sub> O <sub>4</sub> N <sub>5</sub>  |
| 57  | Positive | 18   | 359.027    | C <sub>17</sub> H <sub>5</sub> O <sub>5</sub> N <sub>5</sub>  | 58  | Positive | 18   | 359.028    | C <sub>17</sub> H <sub>5</sub> O <sub>5</sub> N <sub>5</sub>  |
| 59  | Positive | 22   | 360.027    | C <sub>21</sub> H <sub>4</sub> O <sub>3</sub> N <sub>4</sub>  | 60  | Positive | 22   | 360.028    | C <sub>21</sub> H <sub>4</sub> O <sub>3</sub> N <sub>4</sub>  |
| 61  | Positive | 16   | 388.126    | C <sub>20</sub> H <sub>16</sub> O <sub>3</sub> N <sub>6</sub> | 62  | Positive | 16   | 388.127    | C <sub>20</sub> H <sub>16</sub> O <sub>3</sub> N <sub>6</sub> |

|            |          |      |         |                                                                |            |          |      |         |                                                                |
|------------|----------|------|---------|----------------------------------------------------------------|------------|----------|------|---------|----------------------------------------------------------------|
| <b>63</b>  | Positive | 16   | 388.128 | C <sub>20</sub> H <sub>16</sub> O <sub>3</sub> N <sub>6</sub>  | <b>64</b>  | Positive | 16   | 389.111 | C <sub>20</sub> H <sub>15</sub> O <sub>4</sub> N <sub>5</sub>  |
| <b>65</b>  | Positive | 16   | 389.112 | C <sub>20</sub> H <sub>15</sub> O <sub>4</sub> N <sub>5</sub>  | <b>66</b>  | Positive | 10.5 | 415.035 | C <sub>13</sub> H <sub>11</sub> O <sub>12</sub> N <sub>4</sub> |
| <b>67</b>  | Positive | 10.5 | 415.036 | C <sub>13</sub> H <sub>11</sub> O <sub>12</sub> N <sub>4</sub> | <b>68</b>  | Positive | 10.5 | 415.037 | C <sub>13</sub> H <sub>11</sub> O <sub>12</sub> N <sub>4</sub> |
| <b>69</b>  | Positive | 9.5  | 429.088 | C <sub>15</sub> H <sub>17</sub> O <sub>11</sub> N <sub>4</sub> | <b>70</b>  | Positive | 19   | 430.086 | C <sub>18</sub> H <sub>10</sub> O <sub>4</sub> N <sub>10</sub> |
| <b>71</b>  | Positive | 19   | 430.087 | C <sub>18</sub> H <sub>10</sub> O <sub>4</sub> N <sub>10</sub> | <b>72</b>  | Positive | 19   | 430.088 | C <sub>18</sub> H <sub>10</sub> O <sub>4</sub> N <sub>10</sub> |
| <b>73</b>  | Positive | 19   | 430.089 | C <sub>18</sub> H <sub>10</sub> O <sub>4</sub> N <sub>10</sub> | <b>74</b>  | Positive | 9.5  | 431.067 | C <sub>14</sub> H <sub>15</sub> O <sub>12</sub> N <sub>4</sub> |
| <b>75</b>  | Positive | 9.5  | 431.068 | C <sub>14</sub> H <sub>15</sub> O <sub>12</sub> N <sub>4</sub> | <b>76</b>  | Positive | 9.5  | 431.069 | C <sub>14</sub> H <sub>15</sub> O <sub>12</sub> N <sub>4</sub> |
| <b>77</b>  | Positive | 18   | 431.084 | C <sub>21</sub> H <sub>13</sub> O <sub>6</sub> N <sub>5</sub>  | <b>78</b>  | Positive | 18   | 431.085 | C <sub>21</sub> H <sub>13</sub> O <sub>6</sub> N <sub>5</sub>  |
| <b>79</b>  | Positive | 18   | 431.086 | C <sub>21</sub> H <sub>13</sub> O <sub>6</sub> N <sub>5</sub>  | <b>80</b>  | Positive | 18   | 431.088 | C <sub>21</sub> H <sub>13</sub> O <sub>6</sub> N <sub>5</sub>  |
| <b>81</b>  | Positive | 13.5 | 432.067 | C <sub>18</sub> H <sub>14</sub> O <sub>10</sub> N <sub>3</sub> | <b>82</b>  | Positive | 13.5 | 432.068 | C <sub>18</sub> H <sub>14</sub> O <sub>10</sub> N <sub>3</sub> |
| <b>83</b>  | Positive | 13.5 | 432.069 | C <sub>18</sub> H <sub>14</sub> O <sub>10</sub> N <sub>3</sub> | <b>84</b>  | Positive | 18   | 433.064 | C <sub>20</sub> H <sub>11</sub> O <sub>7</sub> N <sub>5</sub>  |
| <b>85</b>  | Positive | 18   | 433.065 | C <sub>20</sub> H <sub>11</sub> O <sub>7</sub> N <sub>5</sub>  | <b>86</b>  | Positive | 18   | 433.066 | C <sub>20</sub> H <sub>11</sub> O <sub>7</sub> N <sub>5</sub>  |
| <b>87</b>  | Positive | 3.5  | 448.115 | C <sub>11</sub> H <sub>22</sub> O <sub>14</sub> N <sub>5</sub> | <b>88</b>  | Positive | 3.5  | 448.116 | C <sub>11</sub> H <sub>22</sub> O <sub>14</sub> N <sub>5</sub> |
| <b>89</b>  | Positive | 3.5  | 448.117 | C <sub>11</sub> H <sub>22</sub> O <sub>14</sub> N <sub>5</sub> | <b>90</b>  | Positive | 1.5  | 448.349 | C <sub>21</sub> H <sub>46</sub> O <sub>5</sub> N <sub>5</sub>  |
| <b>91</b>  | Positive | 1.5  | 448.35  | C <sub>21</sub> H <sub>46</sub> O <sub>5</sub> N <sub>5</sub>  | <b>92</b>  | Positive | 1.5  | 448.351 | C <sub>21</sub> H <sub>46</sub> O <sub>5</sub> N <sub>5</sub>  |
| <b>93</b>  | Positive | 1.5  | 448.352 | C <sub>21</sub> H <sub>46</sub> O <sub>5</sub> N <sub>5</sub>  | <b>94</b>  | Positive | 8    | 449.112 | C <sub>13</sub> H <sub>19</sub> O <sub>11</sub> N <sub>7</sub> |
| <b>95</b>  | Positive | 8    | 449.113 | C <sub>13</sub> H <sub>19</sub> O <sub>11</sub> N <sub>7</sub> | <b>96</b>  | Positive | 8    | 449.114 | C <sub>13</sub> H <sub>19</sub> O <sub>11</sub> N <sub>7</sub> |
| <b>97</b>  | Positive | 8    | 449.118 | C <sub>13</sub> H <sub>19</sub> O <sub>11</sub> N <sub>7</sub> | <b>98</b>  | Positive | 8    | 449.119 | C <sub>13</sub> H <sub>19</sub> O <sub>11</sub> N <sub>7</sub> |
| <b>99</b>  | Positive | 8    | 449.121 | C <sub>13</sub> H <sub>19</sub> O <sub>11</sub> N <sub>7</sub> | <b>100</b> | Positive | 8    | 449.122 | C <sub>13</sub> H <sub>19</sub> O <sub>11</sub> N <sub>7</sub> |
| <b>101</b> | Positive | 12   | 450.112 | C <sub>17</sub> H <sub>18</sub> O <sub>9</sub> N <sub>6</sub>  | <b>102</b> | Positive | 12   | 450.113 | C <sub>17</sub> H <sub>18</sub> O <sub>9</sub> N <sub>6</sub>  |
| <b>103</b> | Positive | 12   | 450.114 | C <sub>17</sub> H <sub>18</sub> O <sub>9</sub> N <sub>6</sub>  | <b>104</b> | Positive | 12   | 450.115 | C <sub>17</sub> H <sub>18</sub> O <sub>9</sub> N <sub>6</sub>  |
| <b>105</b> | Positive | 7.5  | 462.146 | C <sub>16</sub> H <sub>24</sub> O <sub>11</sub> N <sub>5</sub> | <b>106</b> | Positive | 11.5 | 463.144 | C <sub>20</sub> H <sub>23</sub> O <sub>9</sub> N <sub>4</sub>  |
| <b>107</b> | Positive | 11.5 | 463.145 | C <sub>20</sub> H <sub>23</sub> O <sub>9</sub> N <sub>4</sub>  | <b>108</b> | Positive | 11   | 463.146 | C <sub>20</sub> H <sub>23</sub> O <sub>9</sub> N <sub>4</sub>  |
| <b>109</b> | Positive | 11   | 464.142 | C <sub>21</sub> H <sub>24</sub> O <sub>10</sub> N <sub>2</sub> | <b>110</b> | Positive | 10.5 | 464.15  | C <sub>21</sub> H <sub>24</sub> O <sub>10</sub> N <sub>2</sub> |
| <b>111</b> | Positive | 11   | 464.151 | C <sub>21</sub> H <sub>24</sub> O <sub>10</sub> N <sub>2</sub> | <b>112</b> | Positive | 2.5  | 465.14  | C <sub>11</sub> H <sub>25</sub> O <sub>14</sub> N <sub>6</sub> |
| <b>113</b> | Positive | 2.5  | 465.141 | C <sub>11</sub> H <sub>25</sub> O <sub>14</sub> N <sub>6</sub> | <b>114</b> | Positive | 2.5  | 465.143 | C <sub>11</sub> H <sub>25</sub> O <sub>14</sub> N <sub>6</sub> |
| <b>115</b> | Positive | 2.5  | 465.144 | C <sub>11</sub> H <sub>25</sub> O <sub>14</sub> N <sub>6</sub> | <b>116</b> | Positive | 2.5  | 465.146 | C <sub>11</sub> H <sub>25</sub> O <sub>14</sub> N <sub>6</sub> |
| <b>117</b> | Positive | 2.5  | 465.147 | C <sub>11</sub> H <sub>25</sub> O <sub>14</sub> N <sub>6</sub> | <b>118</b> | Positive | 2.5  | 465.149 | C <sub>11</sub> H <sub>25</sub> O <sub>14</sub> N <sub>6</sub> |
| <b>119</b> | Positive | 2.5  | 465.15  | C <sub>11</sub> H <sub>25</sub> O <sub>14</sub> N <sub>6</sub> | <b>120</b> | Positive | 19.5 | 466.138 | C <sub>27</sub> H <sub>20</sub> O <sub>5</sub> N <sub>3</sub>  |
| <b>121</b> | Positive | 19.5 | 466.14  | C <sub>27</sub> H <sub>20</sub> O <sub>5</sub> N <sub>3</sub>  | <b>122</b> | Positive | 19.5 | 466.141 | C <sub>27</sub> H <sub>20</sub> O <sub>5</sub> N <sub>3</sub>  |
| <b>123</b> | Positive | 19.5 | 466.144 | C <sub>27</sub> H <sub>20</sub> O <sub>5</sub> N <sub>3</sub>  | <b>124</b> | Positive | 15   | 466.146 | C <sub>23</sub> H <sub>22</sub> O <sub>7</sub> N <sub>4</sub>  |
| <b>125</b> | Positive | 15   | 466.147 | C <sub>23</sub> H <sub>22</sub> O <sub>7</sub> N <sub>4</sub>  | <b>126</b> | Positive | 15   | 466.148 | C <sub>23</sub> H <sub>22</sub> O <sub>7</sub> N <sub>4</sub>  |
| <b>127</b> | Positive | 15   | 466.149 | C <sub>23</sub> H <sub>22</sub> O <sub>7</sub> N <sub>4</sub>  | <b>128</b> | Positive | 11   | 486.258 | C <sub>24</sub> H <sub>34</sub> O <sub>5</sub> N <sub>6</sub>  |
| <b>129</b> | Positive | 11   | 486.259 | C <sub>24</sub> H <sub>34</sub> O <sub>5</sub> N <sub>6</sub>  | <b>130</b> | Positive | 20   | 489.054 | C <sub>22</sub> H <sub>11</sub> O <sub>9</sub> N <sub>5</sub>  |
| <b>131</b> | Positive | 20   | 489.055 | C <sub>22</sub> H <sub>11</sub> O <sub>9</sub> N <sub>5</sub>  | <b>132</b> | Positive | 20   | 489.056 | C <sub>22</sub> H <sub>11</sub> O <sub>9</sub> N <sub>5</sub>  |
| <b>133</b> | Negative | 5.5  | 138.019 | C <sub>6</sub> H <sub>4</sub> O <sub>3</sub> N                 | <b>134</b> | Negative | 6.5  | 149.045 | C <sub>6</sub> H <sub>5</sub> ON <sub>4</sub>                  |
| <b>135</b> | Negative | 3    | 224.027 | C <sub>5</sub> H <sub>8</sub> O <sub>8</sub> N <sub>2</sub>    | <b>136</b> | Negative | 7.5  | 225.025 | C <sub>7</sub> H <sub>5</sub> O <sub>5</sub> N <sub>4</sub>    |
| <b>137</b> | Negative | 5.5  | 250.144 | C <sub>14</sub> H <sub>20</sub> O <sub>3</sub> N               | <b>138</b> | Negative | 13.5 | 297.047 | C <sub>11</sub> H <sub>5</sub> O <sub>3</sub> N <sub>8</sub>   |
| <b>139</b> | Negative | 13.5 | 299.026 | C <sub>10</sub> H <sub>3</sub> O <sub>4</sub> N <sub>8</sub>   |            |          |      |         |                                                                |

**Table S5.** CHO compounds identified resulting from the reaction of O<sub>3</sub> and breath in positive (cluster 3 in figure S3a) and negative mode (cluster 5 in figure S3b).

| No. | Mode     | DBE | <i>m/z</i> | Formula                                        | No. | Mode     | DBE | <i>m/z</i> | Formula                                       |
|-----|----------|-----|------------|------------------------------------------------|-----|----------|-----|------------|-----------------------------------------------|
| 1   | Positive | 0.5 | 59.049     | C <sub>3</sub> H <sub>7</sub> O                | 2   | Positive | 0.5 | 59.05      | C <sub>3</sub> H <sub>7</sub> O               |
| 3   | Positive | 0.5 | 59.053     | C <sub>3</sub> H <sub>7</sub> O                | 4   | Positive | 0.5 | 59.054     | C <sub>3</sub> H <sub>7</sub> O               |
| 5   | Positive | 0.5 | 61.028     | C <sub>2</sub> H <sub>5</sub> O <sub>2</sub>   | 6   | Positive | 1.5 | 71.049     | C <sub>4</sub> H <sub>7</sub> O               |
| 7   | Positive | 1.5 | 73.028     | C <sub>3</sub> H <sub>5</sub> O <sub>2</sub>   | 8   | Positive | 0.5 | 73.064     | C <sub>4</sub> H <sub>9</sub> O               |
| 9   | Positive | 0.5 | 75.044     | C <sub>3</sub> H <sub>7</sub> O <sub>2</sub>   | 10  | Positive | 2.5 | 83.049     | C <sub>5</sub> H <sub>7</sub> O               |
| 11  | Positive | 2.5 | 85.028     | C <sub>4</sub> H <sub>5</sub> O <sub>2</sub>   | 12  | Positive | 1.5 | 85.064     | C <sub>5</sub> H <sub>9</sub> O               |
| 13  | Positive | 1.5 | 87.044     | C <sub>4</sub> H <sub>7</sub> O <sub>2</sub>   | 14  | Positive | 0.5 | 87.08      | C <sub>5</sub> H <sub>11</sub> O              |
| 15  | Positive | 0.5 | 89.059     | C <sub>4</sub> H <sub>9</sub> O <sub>2</sub>   | 16  | Positive | 3.5 | 95.049     | C <sub>6</sub> H <sub>7</sub> O               |
| 17  | Positive | 2.5 | 97.064     | C <sub>6</sub> H <sub>9</sub> O                | 18  | Positive | 2.5 | 99.043     | C <sub>5</sub> H <sub>7</sub> O <sub>2</sub>  |
| 19  | Positive | 2.5 | 99.044     | C <sub>5</sub> H <sub>7</sub> O <sub>2</sub>   | 20  | Positive | 1.5 | 99.08      | C <sub>6</sub> H <sub>11</sub> O              |
| 21  | Positive | 1.5 | 101.059    | C <sub>5</sub> H <sub>9</sub> O <sub>2</sub>   | 22  | Positive | 5.5 | 105.036    | C <sub>7</sub> H <sub>5</sub> O               |
| 23  | Positive | 4.5 | 107.049    | C <sub>7</sub> H <sub>7</sub> O                | 24  | Positive | 3.5 | 109.064    | C <sub>7</sub> H <sub>9</sub> O               |
| 25  | Positive | 2.5 | 111.08     | C <sub>7</sub> H <sub>11</sub> O               | 26  | Positive | 2.5 | 113.059    | C <sub>6</sub> H <sub>9</sub> O <sub>2</sub>  |
| 27  | Positive | 1.5 | 113.096    | C <sub>7</sub> H <sub>13</sub> O               | 28  | Positive | 1.5 | 115.075    | C <sub>6</sub> H <sub>11</sub> O <sub>2</sub> |
| 29  | Positive | 0.5 | 115.111    | C <sub>7</sub> H <sub>15</sub> O               | 30  | Positive | 0.5 | 117.09     | C <sub>6</sub> H <sub>13</sub> O <sub>2</sub> |
| 31  | Positive | 4.5 | 121.064    | C <sub>8</sub> H <sub>9</sub> O                | 32  | Positive | 4.5 | 123.043    | C <sub>7</sub> H <sub>7</sub> O <sub>2</sub>  |
| 33  | Positive | 3.5 | 123.079    | C <sub>8</sub> H <sub>11</sub> O               | 34  | Positive | 3.5 | 123.08     | C <sub>8</sub> H <sub>11</sub> O              |
| 35  | Positive | 3.5 | 125.059    | C <sub>7</sub> H <sub>9</sub> O <sub>2</sub>   | 36  | Positive | 2.5 | 125.096    | C <sub>8</sub> H <sub>13</sub> O              |
| 37  | Positive | 2.5 | 127.075    | C <sub>7</sub> H <sub>11</sub> O <sub>2</sub>  | 38  | Positive | 0.5 | 127.111    | C <sub>8</sub> H <sub>15</sub> O              |
| 39  | Positive | 1.5 | 129.09     | C <sub>7</sub> H <sub>13</sub> O <sub>2</sub>  | 40  | Positive | 5.5 | 133.064    | C <sub>9</sub> H <sub>9</sub> O               |
| 41  | Positive | 4.5 | 137.059    | C <sub>8</sub> H <sub>9</sub> O <sub>2</sub>   | 42  | Positive | 3.5 | 137.096    | C <sub>9</sub> H <sub>13</sub> O              |
| 43  | Positive | 3.5 | 139.075    | C <sub>8</sub> H <sub>11</sub> O <sub>2</sub>  | 44  | Positive | 2.5 | 141.09     | C <sub>8</sub> H <sub>13</sub> O <sub>2</sub> |
| 45  | Positive | 1.5 | 141.127    | C <sub>9</sub> H <sub>17</sub> O               | 46  | Positive | 1.5 | 143.106    | C <sub>8</sub> H <sub>15</sub> O <sub>2</sub> |
| 47  | Positive | 0.5 | 145.122    | C <sub>8</sub> H <sub>17</sub> O <sub>2</sub>  | 48  | Positive | 1.5 | 147.064    | C <sub>6</sub> H <sub>11</sub> O <sub>4</sub> |
| 49  | Positive | 5.5 | 147.08     | C <sub>10</sub> H <sub>11</sub> O              | 50  | Positive | 1.5 | 149.044    | C <sub>5</sub> H <sub>9</sub> O <sub>5</sub>  |
| 51  | Positive | 4.5 | 149.096    | C <sub>10</sub> H <sub>13</sub> O              | 52  | Positive | 3.5 | 151.111    | C <sub>10</sub> H <sub>15</sub> O             |
| 53  | Positive | 3.5 | 153.09     | C <sub>9</sub> H <sub>13</sub> O <sub>2</sub>  | 54  | Positive | 2.5 | 153.127    | C <sub>10</sub> H <sub>17</sub> O             |
| 55  | Positive | 2.5 | 155.106    | C <sub>9</sub> H <sub>15</sub> O <sub>2</sub>  | 56  | Positive | 1.5 | 157.122    | C <sub>9</sub> H <sub>17</sub> O <sub>2</sub> |
| 57  | Positive | 6.5 | 163.038    | C <sub>9</sub> H <sub>7</sub> O <sub>3</sub>   | 58  | Positive | 4.5 | 163.111    | C <sub>11</sub> H <sub>15</sub> O             |
| 59  | Positive | 4.5 | 165.09     | C <sub>10</sub> H <sub>13</sub> O <sub>2</sub> | 60  | Positive | 0.5 | 167.055    | C <sub>5</sub> H <sub>11</sub> O <sub>6</sub> |
| 61  | Positive | 3.5 | 167.106    | C <sub>10</sub> H <sub>15</sub> O <sub>2</sub> | 62  | Positive | 0.5 | 169.034    | C <sub>4</sub> H <sub>9</sub> O <sub>7</sub>  |
| 63  | Positive | 2.5 | 169.122    | C <sub>10</sub> H <sub>17</sub> O <sub>2</sub> | 64  | Positive | 3.5 | 193.158    | C <sub>13</sub> H <sub>21</sub> O             |
| 65  | Positive | 3.5 | 207.174    | C <sub>14</sub> H <sub>23</sub> O              | 66  | Positive | 4.5 | 219.174    | C <sub>15</sub> H <sub>23</sub> O             |

|            |          |     |         |                                                |            |          |     |         |                                                 |
|------------|----------|-----|---------|------------------------------------------------|------------|----------|-----|---------|-------------------------------------------------|
| <b>67</b>  | Positive | 4.5 | 221.153 | C <sub>14</sub> H <sub>21</sub> O <sub>2</sub> | <b>68</b>  | Positive | 3.5 | 221.189 | C <sub>15</sub> H <sub>25</sub> O               |
| <b>69</b>  | Positive | 4.5 | 235.169 | C <sub>15</sub> H <sub>23</sub> O <sub>2</sub> | <b>70</b>  | Positive | 3.5 | 237.184 | C <sub>15</sub> H <sub>25</sub> O <sub>2</sub>  |
| <b>71</b>  | Positive | 3.5 | 281.049 | C <sub>9</sub> H <sub>13</sub> O <sub>10</sub> | <b>72</b>  | Positive | 3.5 | 281.05  | C <sub>9</sub> H <sub>13</sub> O <sub>10</sub>  |
| <b>73</b>  | Positive | 3.5 | 361.024 | C <sub>9</sub> H <sub>13</sub> O <sub>15</sub> | <b>74</b>  | Positive | 3.5 | 361.025 | C <sub>9</sub> H <sub>13</sub> O <sub>15</sub>  |
| <b>75</b>  | Positive | 3.5 | 361.026 | C <sub>9</sub> H <sub>13</sub> O <sub>15</sub> | <b>76</b>  | Positive | 5.5 | 447.345 | C <sub>28</sub> H <sub>47</sub> O <sub>4</sub>  |
| <b>77</b>  | Positive | 5.5 | 447.346 | C <sub>28</sub> H <sub>47</sub> O <sub>4</sub> | <b>78</b>  | Positive | 1   | 486.267 | C <sub>21</sub> H <sub>42</sub> O <sub>12</sub> |
| <b>79</b>  | Negative | 1.5 | 59.013  | C <sub>2</sub> H <sub>3</sub> O <sub>2</sub>   | <b>80</b>  | Negative | 2.5 | 69.034  | C <sub>4</sub> H <sub>5</sub> O                 |
| <b>81</b>  | Negative | 2.5 | 71.013  | C <sub>3</sub> H <sub>3</sub> O <sub>2</sub>   | <b>82</b>  | Negative | 1.5 | 71.05   | C <sub>4</sub> H <sub>7</sub> O                 |
| <b>83</b>  | Negative | 2.5 | 72.993  | C <sub>2</sub> HO <sub>3</sub>                 | <b>84</b>  | Negative | 2.5 | 72.993  | C <sub>2</sub> HO <sub>3</sub>                  |
| <b>85</b>  | Negative | 1.5 | 73.029  | C <sub>3</sub> H <sub>5</sub> O <sub>2</sub>   | <b>86</b>  | Negative | 1.5 | 75.008  | C <sub>2</sub> H <sub>3</sub> O <sub>3</sub>    |
| <b>87</b>  | Negative | 3.5 | 81.034  | C <sub>5</sub> H <sub>5</sub> O                | <b>88</b>  | Negative | 2.5 | 83.05   | C <sub>5</sub> H <sub>7</sub> O                 |
| <b>89</b>  | Negative | 2.5 | 85.029  | C <sub>4</sub> H <sub>5</sub> O <sub>2</sub>   | <b>90</b>  | Negative | 2.5 | 87.008  | C <sub>3</sub> H <sub>3</sub> O <sub>3</sub>    |
| <b>91</b>  | Negative | 1.5 | 87.045  | C <sub>4</sub> H <sub>7</sub> O <sub>2</sub>   | <b>92</b>  | Negative | 2.5 | 99.045  | C <sub>5</sub> H <sub>7</sub> O <sub>2</sub>    |
| <b>93</b>  | Negative | 2.5 | 101.024 | C <sub>4</sub> H <sub>5</sub> O <sub>3</sub>   | <b>94</b>  | Negative | 1.5 | 103.04  | C <sub>4</sub> H <sub>7</sub> O <sub>3</sub>    |
| <b>95</b>  | Negative | 4.5 | 109.029 | C <sub>6</sub> H <sub>5</sub> O <sub>2</sub>   | <b>96</b>  | Negative | 3.5 | 113.024 | C <sub>5</sub> H <sub>5</sub> O <sub>3</sub>    |
| <b>97</b>  | Negative | 2.5 | 115.04  | C <sub>5</sub> H <sub>7</sub> O <sub>3</sub>   | <b>98</b>  | Negative | 1.5 | 117.055 | C <sub>5</sub> H <sub>9</sub> O <sub>3</sub>    |
| <b>99</b>  | Negative | 4.5 | 125.024 | C <sub>6</sub> H <sub>5</sub> O <sub>3</sub>   | <b>100</b> | Negative | 3.5 | 127.04  | C <sub>6</sub> H <sub>7</sub> O <sub>3</sub>    |
| <b>101</b> | Negative | 2.5 | 129.055 | C <sub>6</sub> H <sub>9</sub> O <sub>3</sub>   | <b>102</b> | Negative | 2.5 | 143.071 | C <sub>7</sub> H <sub>11</sub> O <sub>3</sub>   |
| <b>103</b> | Negative | 4.5 | 151.076 | C <sub>9</sub> H <sub>11</sub> O <sub>2</sub>  | <b>104</b> | Negative | 3.5 | 155.071 | C <sub>8</sub> H <sub>11</sub> O <sub>3</sub>   |
| <b>105</b> | Negative | 2.5 | 157.086 | C <sub>8</sub> H <sub>13</sub> O <sub>3</sub>  | <b>106</b> | Negative | 2.5 | 157.087 | C <sub>8</sub> H <sub>13</sub> O <sub>3</sub>   |
| <b>107</b> | Negative | 1.5 | 159.102 | C <sub>8</sub> H <sub>15</sub> O <sub>3</sub>  | <b>108</b> | Negative | 4.5 | 167.071 | C <sub>9</sub> H <sub>11</sub> O <sub>3</sub>   |
| <b>109</b> | Negative | 3.5 | 169.087 | C <sub>9</sub> H <sub>13</sub> O <sub>3</sub>  | <b>110</b> | Negative | 2.5 | 171.102 | C <sub>9</sub> H <sub>15</sub> O <sub>3</sub>   |
| <b>111</b> | Negative | 5.5 | 179.071 | C <sub>10</sub> H <sub>11</sub> O <sub>3</sub> | <b>112</b> | Negative | 2.5 | 185.082 | C <sub>8</sub> H <sub>13</sub> O <sub>3</sub>   |
| <b>113</b> | Negative | 8.5 | 201.055 | C <sub>12</sub> H <sub>9</sub> O <sub>3</sub>  | <b>114</b> | Negative | 5   | 236.141 | C <sub>14</sub> H <sub>20</sub> O <sub>3</sub>  |

100 **Table S6.** Compounds identified resulting from the reaction of O<sub>3</sub> and individual gas standards.

| No. | STD      | Compound      | formula                                        | Ion mode                              | Elemental composition                                       | <i>m/z</i> | Δ <i>mmu</i> | Mixing ratio (pptv) <sup>a</sup> |
|-----|----------|---------------|------------------------------------------------|---------------------------------------|-------------------------------------------------------------|------------|--------------|----------------------------------|
| 1   | Isoprene | A10           | C <sub>5</sub> H <sub>8</sub> O <sub>2</sub>   | [M+H] <sup>+</sup>                    | C <sub>5</sub> H <sub>9</sub> O <sub>2</sub>                | 101.059    | −0.036       | 121                              |
| 2   |          | Product 1     | C <sub>3</sub> H <sub>2</sub> O <sub>3</sub>   | [M−H] <sup>−</sup>                    | C <sub>3</sub> HO <sub>3</sub>                              | 84.990     | −2.427       | 1479                             |
| 3   |          | 3-Methylfuran | C <sub>5</sub> H <sub>6</sub> O                | [M+H] <sup>+</sup>                    | C <sub>5</sub> H <sub>7</sub> O                             | 83.049     | −0.061       | 26                               |
| 4   |          | A10           | C <sub>5</sub> H <sub>8</sub> O <sub>2</sub>   | [M+H] <sup>+</sup> ( <sup>13</sup> C) | C <sub>4</sub> <sup>13</sup> CH <sub>9</sub> O <sub>2</sub> | 102.063    | −0.041       | 6                                |
| 5   |          | Product 2     | C <sub>9</sub> H <sub>14</sub> O <sub>2</sub>  | [M+H] <sup>+</sup>                    | C <sub>9</sub> H <sub>15</sub> O <sub>2</sub>               | 155.106    | −0.056       | 8                                |
|     |          |               |                                                | [M+H−H <sub>2</sub> O] <sup>+</sup>   | C <sub>9</sub> H <sub>13</sub> O                            | 137.096    | 0.028        | 12                               |
| 6   |          | Product 3     | C <sub>10</sub> H <sub>14</sub> O <sub>2</sub> | [M+H] <sup>+</sup>                    | C <sub>10</sub> H <sub>15</sub> O <sub>2</sub>              | 167.106    | 0.024        | 11                               |
| 7   |          | Product 4     | C <sub>15</sub> H <sub>23</sub> O              | [M+H] <sup>+</sup>                    | C <sub>15</sub> H <sub>24</sub> O                           | 220.182    | −0.097       | 40                               |
|     |          |               |                                                | [M+H] <sup>+</sup> ( <sup>13</sup> C) | C <sub>14</sub> <sup>13</sup> CH <sub>24</sub> O            | 221.185    | −0.072       | 6                                |
| 8   |          | Product 5     | C <sub>2</sub> H <sub>4</sub> O <sub>3</sub>   | [M−H] <sup>−</sup>                    | C <sub>2</sub> H <sub>3</sub> O <sub>3</sub>                | 75.008     | 0.013        | 77                               |
| 9   |          | Product 6     | C <sub>4</sub> H <sub>2</sub> O <sub>4</sub>   | [M−H] <sup>−</sup>                    | C <sub>4</sub> HO <sub>4</sub>                              | 112.985    | −2.412       | 41                               |

|    |             |            |                                                             |                                       |                                                  |         |        |      |
|----|-------------|------------|-------------------------------------------------------------|---------------------------------------|--------------------------------------------------|---------|--------|------|
| 10 |             | Product 7  | C <sub>5</sub> H <sub>8</sub> O <sub>3</sub>                | [M-H] <sup>-</sup>                    | C <sub>5</sub> H <sub>7</sub> O <sub>3</sub>     | 115.040 | -0.007 | 9    |
| 11 |             | Product 8  | C <sub>6</sub> H <sub>10</sub> O <sub>3</sub>               | [M-H] <sup>-</sup>                    | C <sub>6</sub> H <sub>9</sub> O <sub>3</sub>     | 129.055 | 0.053  | 34   |
| 12 |             | Product 9  | C <sub>2</sub> H <sub>2</sub> O <sub>6</sub> N <sub>3</sub> | [M-H] <sup>-</sup>                    | C <sub>2</sub> HO <sub>6</sub> N <sub>3</sub>    | 162.982 | -4.643 | 41   |
| 13 | α-Terpinene | B10        | C <sub>5</sub> H <sub>8</sub> O <sub>2</sub>                | [M+H] <sup>+</sup>                    | C <sub>5</sub> H <sub>9</sub> O <sub>2</sub>     | 101.059 | -0.026 | 124  |
| 14 |             | Product 10 | CH <sub>2</sub> O <sub>3</sub>                              | [M-H] <sup>-</sup>                    | CHO <sub>3</sub>                                 | 60.993  | 0.023  | 543  |
| 15 |             | Product 11 | CH <sub>3</sub> O <sub>4</sub>                              | [M-H] <sup>-</sup>                    | CH <sub>2</sub> O <sub>4</sub>                   | 77.991  | -4.476 | 1206 |
| 16 |             | Product 12 | CH <sub>2</sub> O <sub>4</sub>                              | [M-H] <sup>-</sup>                    | CHO <sub>4</sub>                                 | 76.988  | 0.038  | 2178 |
| 17 |             | Product 13 | CH <sub>3</sub> O <sub>3</sub>                              | [M-H] <sup>-</sup>                    | CH <sub>2</sub> O <sub>3</sub>                   | 61.996  | -4.722 | 709  |
|    |             |            |                                                             | [M+H-H <sub>2</sub> O] <sup>+</sup>   | C <sub>5</sub> H <sub>7</sub> O                  | 83.049  | -0.061 | 27   |
| 18 |             | Product 14 | C <sub>7</sub> H <sub>8</sub> O <sub>2</sub>                | [M+H] <sup>+</sup>                    | C <sub>7</sub> H <sub>9</sub> O <sub>2</sub>     | 125.059 | 0.054  | 7    |
| 19 |             | Product 15 | C <sub>10</sub> H <sub>16</sub> O <sub>3</sub>              | [M+H-H <sub>2</sub> O] <sup>+</sup>   | C <sub>10</sub> H <sub>15</sub> O <sub>2</sub>   | 167.106 | 0.034  | 22   |
| 20 |             | Product 16 | C <sub>15</sub> H <sub>23</sub> O                           | [M+H] <sup>+</sup>                    | C <sub>15</sub> H <sub>24</sub> O                | 220.182 | -0.087 | 38   |
|    |             |            |                                                             | [M+H] <sup>+</sup> ( <sup>13</sup> C) | C <sub>14</sub> <sup>13</sup> CH <sub>24</sub> O | 221.185 | -0.072 | 6    |

---

|    |            |                                                |                                       |                                                |         |        |    |
|----|------------|------------------------------------------------|---------------------------------------|------------------------------------------------|---------|--------|----|
| 21 | Product 17 | CHO <sub>3</sub>                               | [M-H] <sup>-</sup>                    | CO <sub>3</sub>                                | 59.985  | 0.008  | 19 |
|    |            |                                                | [M-H] <sup>-</sup> ( <sup>13</sup> C) | <sup>13</sup> CO <sub>3</sub>                  | 60.988  | 0.133  | 14 |
| 22 | Product 18 | H <sub>2</sub> O <sub>4</sub> N                | [M-H] <sup>-</sup>                    | HO <sub>4</sub> N                              | 78.992  | 1.174  | 36 |
| 23 | Product 19 | C <sub>16</sub> H <sub>32</sub> O <sub>2</sub> | [M-H] <sup>-</sup>                    | C <sub>16</sub> H <sub>31</sub> O <sub>2</sub> | 255.232 | -0.124 | 13 |

101 <sup>a</sup>The mixing ratio of each product compound was calculated as follows:  $C_{i, \text{breath}} - C_{i, \text{blank}}$ , where  $C_{i, \text{breath}}$  is the mixing ratio of  
102 compound  $i$  in breath and  $C_{i, \text{blank}}$  is the mixing ratio of compound  $i$  in the blank sample

## 103 References

- 104 1. J. Zeng, M. Mekic, X. Xu, G. Loisel, Z. Zhou, S. Gligorovski and X. Li, A novel insight into  
105 the ozone-skin lipid oxidation products observed by secondary electrospray ionization high-  
106 resolution mass spectrometry, *Environ. Sci. Technol.*, 2020, **54**, 13478–13487.
- 107 2. T. K. Kim, T test as a parametric statistic, *Korean J. Anesthesiol.*, 2015, **68**, 540–546.
- 108 3. M. M. Yassine, M. Harir, E. Dabek-Zlotorzynska and P. Schmitt-Kopplin, Structural  
109 characterization of organic aerosol using Fourier transform ion cyclotron resonance mass  
110 spectrometry: Aromaticity equivalent approach, *Rapid Commun. Mass Spectrom.*, 2014, **28**,  
111 2445–2454.
- 112 4. I. Kourtchev, R. H. M. Godoi, S. Connors, J. G. Levine, A. T. Archibald, A. F. L. Godoi, S.  
113 L. Paralovo, C. G. G. Barbosa, R. A. F. Souza, A. O. Manzi, R. Seco, S. Sjostedt, J. H. Park,  
114 A. Guenther, S. Kim, J. Smith, S. T. Martin and M. Kalberer, Molecular composition of  
115 organic aerosols in central amazonia: an ultra-high-resolution mass spectrometry study,  
116 *Atmos. Chem. Phys.*, 2016, **16**, 11899–11913.
- 117 5. X. Wang, N. Hayeck, M. Brüggemann, L. Yao, H. Chen, C. Zhang, C. Emmelin, J. Chen, C.  
118 George and L. Wang, Chemical characteristics of organic aerosols in Shanghai: a Study by  
119 ultrahigh-performance liquid chromatography coupled with orbitrap mass spectrometry, *J.*  
120 *Geophys. Res. Atmos.*, 2017, **122**, 11,703-11,722.
- 121 6. M. Mekic, J. Zeng, B. Jiang, X. Li, Y. G. Lazarou, M. Brigante, H. Herrmann and S.  
122 Gligorovski, Formation of toxic unsaturated multifunctional and organosulfur compounds  
123 from the photosensitized processing of fluorene and DMSO at the air-water interface, *J.*  
124 *Geophys. Res. Atmos.*, 2020, **125**, e2019JD031839.

- 125 7. Y. Wang, M. Mekic, P. Li, H. Deng, S. Liu, B. Jiang, B. Jin, D. Vione and S. Gligorovski,  
126 Ionic strength effect triggers brown carbon formation through heterogeneous ozone  
127 processing of ortho-vanillin, *Environ. Sci. Technol.*, 2021, **55**, 4553–4564.
- 128 8. H. J. Lee, P. K. Aiona, A. Laskin, J. Laskin and S. A. Nizkorodov, Effect of solar radiation  
129 on the optical properties and molecular composition of laboratory proxies of atmospheric  
130 brown carbon, *Environ. Sci. Technol.*, 2014, **48**, 10217–10226.
- 131 9. D. E. Romonosky, Y. Li, M. Shiraiwa, A. Laskin, J. Laskin and S. A. Nizkorodov, Aqueous  
132 photochemistry of secondary organic aerosol of  $\alpha$ -pinene and  $\alpha$ -humulene oxidized with  
133 ozone, hydroxyl radical, and nitrate radical, *J. Phys. Chem. A*, 2017, **121**, 1298–1309.
- 134 10. J. Song, M. Li, B. Jiang, S. Wei, X. Fan and P. Peng, Molecular characterization of water-  
135 soluble humic like substances in smoke particles emitted from combustion of biomass  
136 materials and coal using ultrahigh-resolution electrospray ionization fourier transform ion  
137 cyclotron resonance mass spectrometry, *Environ. Sci. Technol.*, 2018, **52**, 2575–2585.
- 138 11. R. H. Perry, R. G. Cooks and R. J. Noll, Orbitrap mass spectrometry: instrumentation, ion  
139 motion and applications, *Mass Spectrom. Rev.*, 2008, **27**, 661–699.
- 140 12. B. R. G. Mabato, Y. Lyu, Y. Ji, D. D. Huang, X. Li, T. Nah, C. H. Lam and C. K. Chan,  
141 Aqueous SOA formation from the photo-oxidation of vanillin: direct photosensitized  
142 reactions and nitrate-mediated reactions, *Atmos. Chem. Phys. Discuss.*, 2021, **2021**, 1–35.
- 143
